# Supplementary material for: IL-21 regulates SOCS1 expression in autoreactive CD8+ T cells but is not required for acquisition of CTL activity in the islets of non-obese diabetic mice
Source: PubMed Central journal article supplement (PMC6814838; doi:10.1038/s41598-019-51636-5), 2019-10-25
Supplement: 41598_2019_51636_MOESM1_ESM.pdf [file 41598_2019_51636_MOESM1_ESM.pdf]

**IL-21 regulates SOCS1 expression in autoreactive CD8<sup>+</sup> T cells but is not required  
for acquisition of CTL activity in the islets of non-obese diabetic mice**

Andrew P. R. Sutherland<sup>1,2\*</sup>, Kate L. Graham<sup>1,2\*</sup>, Michelle Papadimitriou<sup>1</sup>, Gaurang  
Jhala<sup>1,2</sup>, Prerak Trivedi<sup>1,2</sup>, Tara Catterall<sup>1</sup>, Stacey Fynch<sup>1</sup>, Thomas W. H. Kay<sup>1,2</sup>, Helen E.  
Thomas<sup>1,2</sup>

<sup>1</sup>St Vincent's Institute of Medical Research, Melbourne, Australia

<sup>2</sup>The University of Melbourne, Department of Medicine, St. Vincent's Hospital, Fitzroy,  
Victoria, Australia

\*Authors contributed equally

Address correspondence to:

A/Prof Helen Thomas

St. Vincent's Institute of Medical Research, 9 Princes Street, Fitzroy, VIC 3065,  
Australia.

E-mail address: [hthomas@svi.edu.au](mailto:hthomas@svi.edu.au)

Or

Dr. Andrew P. R. Sutherland

St. Vincent's Institute of Medical Research, 9 Princes Street, Fitzroy, VIC 3065,  
Australia.

E-mail address: [asutherland@svi.edu.au](mailto:asutherland@svi.edu.au)

PLN

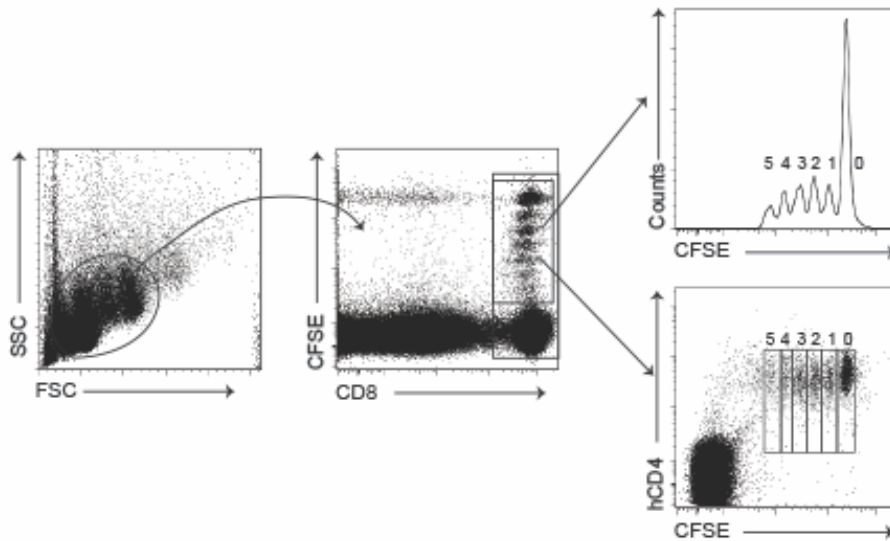

ISLETS

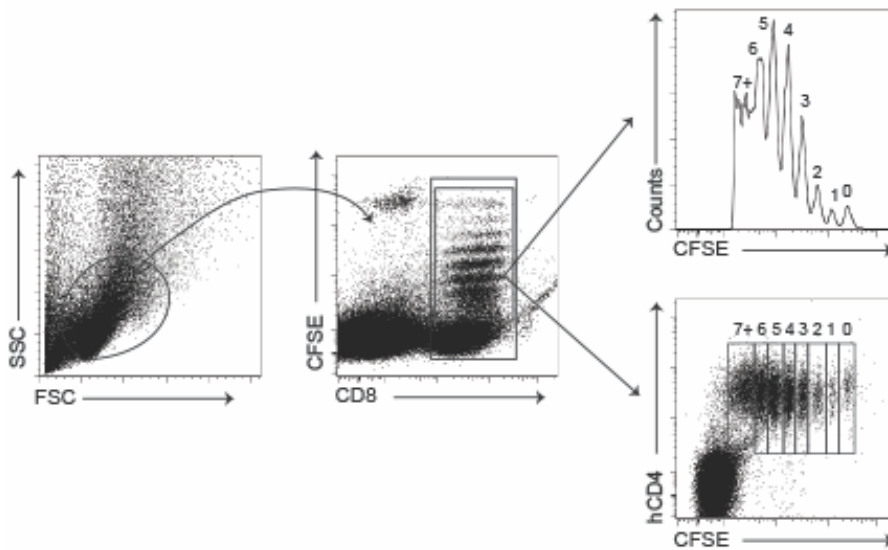

**Supplementary Figure 1: Quantification of CFSE dilution and hCD4 reporter expression in transferred 8.3 T cells in NOD pancreatic lymph nodes and islets.**

Pancreatic lymph nodes and islets were isolated 5 days after 8.3 splenocyte transfer and

anti CD8 antibody staining and CFSE labelling used to identify the transferred 8.3 T cells.
